# Supplementary material for: Developmental Patterns of Positive Affect Among Preadolescents in Primary School: A Two-Year Latent Growth Analysis of Peer, Teacher, and Family Influences
Source: Springer Nature journal article supplement (doi:10.1007/s10902-025-00974-5), 2025-11-10
Supplement: MOESM1 [file 10902_2025_974_MOESM1_ESM.pdf]

## Supplementary Materials

### **Developmental patterns of positive affect among preadolescents in primary school: A two-year latent growth analysis of peer, teacher, and family influences.**

Mölsä, M. E., Söderberg, P., & Forsman, A.K. (2025).

*Journal of Happiness Studies*

#### Contents

1. Table S1. Item descriptions of variables of interest
2. Table S2. CFA results across variables and timepoints
3. Table S3. Longitudinal CFA for positive affect
4. Table S4. The goodness of fit statistics and parameter estimates for linear and quadratic growth models
5. Table S5. Fit indices of the unconditional and conditional linear growth models
6. Table S6. Parameter estimates from separate latent growth models with individual predictors of positive affect growth
7. Table S7. Parameter estimates from the conditional quadratic growth model
8. Figures S1-S3. Scatterplots depicting the relationships between variables at T1 and slopes of positive affect over time

## Supplementary Material 1

Table S1 presents the item descriptions for the variables of interest, including Positive Affect, Peer Relationships, Teacher Sensitivity, and Family Satisfaction.

**Table S1**

*Item descriptions of variables of interest*

| Construct           | Items                                                                                                                                                                                                                                                                                                                                                                                                                     |
|---------------------|---------------------------------------------------------------------------------------------------------------------------------------------------------------------------------------------------------------------------------------------------------------------------------------------------------------------------------------------------------------------------------------------------------------------------|
| Positive Affect     | <ol style="list-style-type: none"><li>1. Positive</li><li>2. Good</li><li>3. Pleasant</li><li>4. Happy</li><li>5. Joyful</li><li>6. Contented</li></ol>                                                                                                                                                                                                                                                                   |
| Peer Relationships  | <ol style="list-style-type: none"><li>1. Have you spent time with your friends?</li><li>2. Have you had fun with your friends?</li><li>3. Have you and your friends helped each other?</li><li>4. Have you been able to rely on your friends?</li></ol>                                                                                                                                                                   |
| Teacher Sensitivity | <ol style="list-style-type: none"><li>1. Our teachers care about how we feel</li><li>2. We can count on our teachers for help when we need it</li><li>3. Our teachers consider pupils' feelings</li><li>4. Our teachers take a personal interest in pupils</li><li>5. Our teachers are available to help pupils when we have questions</li><li>6. Our teachers take the time to completely answer our questions</li></ol> |
| Family Satisfaction | <ol style="list-style-type: none"><li>1. I enjoy being at home with my family</li><li>2. My family gets along well together</li><li>3. I like spending time with my parents</li><li>4. My parents and I doing fun things together</li><li>5. My family is better than most</li><li>6. Members of my family talk nicely to one another</li><li>7. My parents treat me fairly</li></ol>                                     |

## Supplementary Material 2

Table S2 presents the confirmatory factor analysis (CFA) results for PA across four timepoints (T1-T4) and for baseline (T1) predictors, including model fit indices.

**Table S2**

*CFA results across variables and timepoints*

| Model                  | $\chi^2$ (df) | <i>p</i> -value | CFI   | TLI   | RMSEA | SRMR |
|------------------------|---------------|-----------------|-------|-------|-------|------|
| T1 Positive affect     | 9.830 (9)     | .3644           | .997  | .995  | .020  | .021 |
| T2 Positive affect     | 12.764 (9)    | .1736           | .990  | .984  | .042  | .022 |
| T3 Positive affect     | 28.026 (9)    | .0009           | .981  | .968  | .067  | .022 |
| T4 Positive affect     | 16.828 (9)    | .0515           | .990  | .984  | .045  | .023 |
| T1 Peer relations      | 1.181 (2)     | .5539           | 1.000 | 1.000 | .000  | .012 |
| T1 Teacher sensitivity | 25.484 (9)    | .0025           | .947  | .912  | .090  | .038 |
| T1 Family satisfaction | 58.473 (14)   | .0000           | .865  | .797  | .118  | .058 |

*Note.* CFI = Comparative Fit Index. TLI = Tucker-Lewis Index. RMSEA = Root Mean Square Error of Approximation. SRMR = Standardized Root Mean Square Residual.

### Supplementary Material 3

Table S3 presents the longitudinal CFA results for positive affect, showing model fit indices across configural, metric, and scalar invariance models.

**Table S3**

*Longitudinal CFA for positive affect*

| Model           | $\chi^2$ (df) | <i>p</i> -value | CFI  | TLI  | RMSEA | $\Delta$ CFI | $\Delta$ RMSEA |
|-----------------|---------------|-----------------|------|------|-------|--------------|----------------|
| Positive affect |               |                 |      |      |       |              |                |
| Configural      | 327.117 (246) | .0004           | .965 | .960 | .033  |              |                |
| Metric          | 344.978 (261) | .0004           | .963 | .961 | .033  | .002         | .000           |
| Scalar          | 375.136 (276) | .0001           | .957 | .957 | .035  | .006         | .002           |

*Note.* CFI = Comparative Fit Index. TLI = Tucker-Lewis Index. RMSEA = Root Mean Square Error of Approximation.  $\Delta$ CFI = Difference in CFI between models; values  $> .01$  support measurement invariance.  $\Delta$ RMSEA = Difference in RMSEA between models; values  $< .01$  support measurement invariance.

## Supplementary Material 4

Table S4 presents the goodness-of-fit statistics and parameter estimates for linear and quadratic growth models of positive affect.

**Table S4**

*The goodness of fit statistics and parameter estimates for linear and quadratic growth models*

| Measure | Model     | CFI   | TLI   | RMSEA | SRMR | AIC             | BIC             | Intercept |          | Linear slope |          | Quadratic slope |          |
|---------|-----------|-------|-------|-------|------|-----------------|-----------------|-----------|----------|--------------|----------|-----------------|----------|
|         |           |       |       |       |      |                 |                 | Mean      | Variance | Mean         | Variance | Mean            | Variance |
| PA      | Linear    | .982  | .978  | .035  | .045 | 1629.457        | <b>1662.639</b> | 4.068*    | .193*    | -.020        | .024*    |                 |          |
|         | Quadratic | 1.000 | 1.000 | .000  | .052 | <b>1627.866</b> | 1664.736        | 4.032*    | .196*    | .078         | .025*    | -.032           | .00      |

*Note.* \* =  $p < 0.05$ . Bold values indicate the smallest value across the two models. PA = positive affect. CFI = Comparative Fit Index. TLI =

Tucker-Lewis Index. RMSEA = Root Mean Square Error of Approximation. SRMR = Standardized Root Mean Square Residual.

## Supplementary Material 5

Table S5 presents the fit indices for the unconditional (without predictors) and conditional (with predictors) linear latent growth models (LGMs) of positive affect.

**Table S5**

*Fit indices of the unconditional and conditional linear LGMs*

| Fit indices                                                                      | $\chi^2$ (df)        | CFI        | TLI        | RMSEA   | SRMR       |
|----------------------------------------------------------------------------------|----------------------|------------|------------|---------|------------|
| <i>Positive affect</i>                                                           |                      |            |            |         |            |
| Unconditional                                                                    | 6.833 (5)            | .982       | .978       | .035    | .045       |
| <i>Positive affect, Peer relations, Teacher Sensitivity, Family Satisfaction</i> |                      |            |            |         |            |
| Conditional                                                                      | 17.680 (11)          | .968       | .948       | .045    | .081       |
| <i>Fit criteria</i>                                                              |                      |            |            |         |            |
| Good                                                                             | $\chi^2 / df \leq 3$ | $\geq .95$ | $\geq .95$ | $< .05$ | $\leq .05$ |
| Acceptable                                                                       | $\chi^2 / df \leq 5$ | $\geq .90$ | $\geq .90$ | .50-1.0 | $\leq .08$ |

*Note.*  $\chi^2$  = chi-square. (df) = degrees of freedom. CFI = Comparative Fit Index. TLI = Tucker-Lewis Index. RMSEA = Root Mean Square Error of Approximation. SRMR = Standardized Root Mean Square Residual.

## Supplementary Material 6

**Table S6**

*Parameter estimates from separate latent growth models with individual predictors of positive affect growth*

| Predictors of PA growth      | $\beta$ | $p^{std}$ | $B$    | $SE$ | $p^{unstd}$ |
|------------------------------|---------|-----------|--------|------|-------------|
| Model 1: Peer relationships  |         |           |        |      |             |
| Intercept PA                 | .596*   | .000      | .386*  | .084 | .000        |
| Linear slope PA              | -.370*  | .012      | -.087* | .035 | .012        |
| Model 2: Teacher sensitivity |         |           |        |      |             |
| Intercept PA                 | .402*   | .000      | .251*  | .059 | .000        |
| Linear slope PA              | .105    | .372      | .024   | .028 | .387        |
| Model 3: Family satisfaction |         |           |        |      |             |
| Intercept PA                 | .731*   | .000      | .716*  | .080 | .000        |
| Linear slope PA              | -.227   | .077      | -.082  | .047 | .083        |

*Note.* PA = positive affect.  $\beta$  = standardized beta coefficient.  $p^{std}$  =  $p$ -value based on standardized estimates.  $B$  = unstandardized beta coefficient.

$SE$  = standard error based on unstandardized estimates.  $p^{unstd}$  =  $p$ -value based on unstandardized estimates. \* = statistically significant parameter

( $p < .05$ )

**Supplementary Material 7**

**Table S7**

*Parameter estimates from the conditional quadratic growth model*

| Predictors of PA growth         | $\beta$ | $p^{std}$ | $B$   | $SE$ | $p^{unstd}$ |
|---------------------------------|---------|-----------|-------|------|-------------|
| Intercept PA predicted by       |         |           |       |      |             |
| Peer relationships              | .314*   | .003      | .228* | .088 | .009        |
| Teacher sensitivity             | .158    | .083      | .115  | .062 | .065        |
| Family satisfaction             | .552*   | .000      | .594* | .096 | .000        |
| Linear slope PA predicted by    |         |           |       |      |             |
| Peer relationships              | -.526*  | .044      | -.181 | .107 | .092        |
| Teacher sensitivity             | -.006   | .985      | -.002 | .111 | .985        |
| Family satisfaction             | -.301   | .277      | -.153 | .143 | .285        |
| Quadratic slope PA predicted by |         |           |       |      |             |
| Peer relationships              | .547    | .297      | .030  | .032 | .352        |
| Teacher sensitivity             | .357    | .525      | .019  | .033 | .559        |
| Family satisfaction             | .434    | .428      | .035  | .044 | .424        |

*Note.* PA = positive affect.  $\beta$  = standardized beta coefficient.  $p^{std}$  =  $p$ -value based on standardized estimates.  $B$  = unstandardized beta coefficient.

$SE$  = standard error based on unstandardized estimates.  $p^{unstd}$  =  $p$ -value based on unstandardized estimates. \* = statistically significant parameter

( $p < .05$ ).

## Supplementary Material 8

The following figures (S1–S3) present scatterplots from the linear LGM illustrating the relationships between various social-contextual factors at T1 and the slope of positive affect over time. Each point represents an individual participant. The solid line represents the estimated linear association between the predictor and slope PA.

### Figure S1

*Scatterplot illustrating the relationship between Peer relations at T1 and positive affect slope over time*

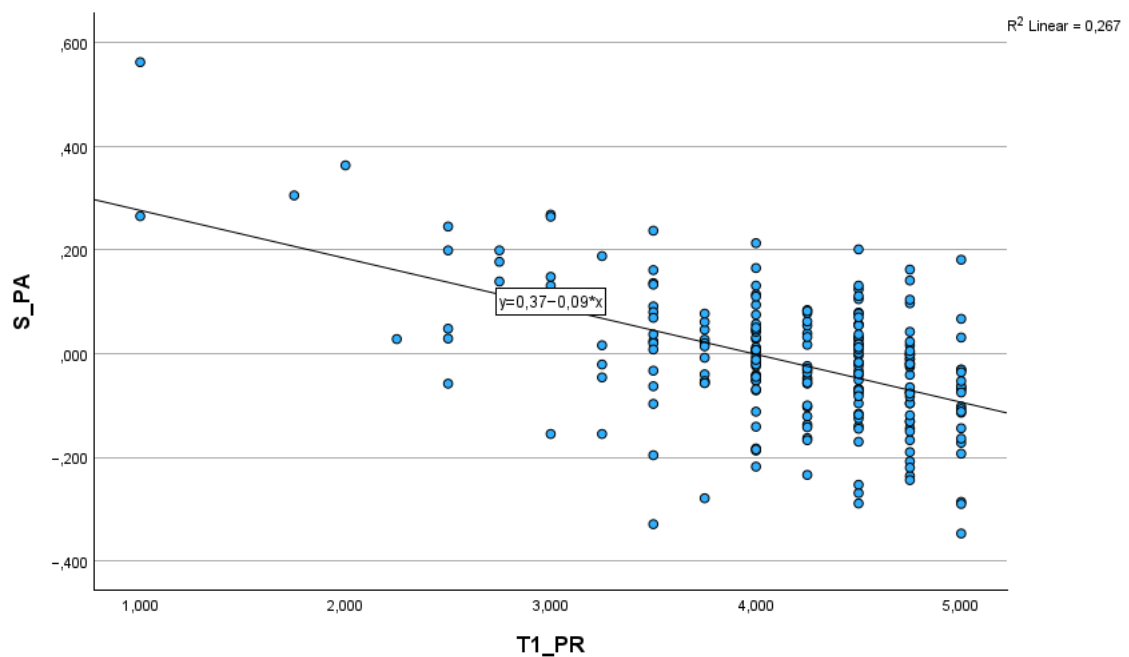

*Note.* S\_PA = Slope PA. T1\_PR = Peer relationship at T1.

**Figure S2**

*Scatterplot illustrating the relationship between Teacher sensitivity at T1 and positive affect slope over time*

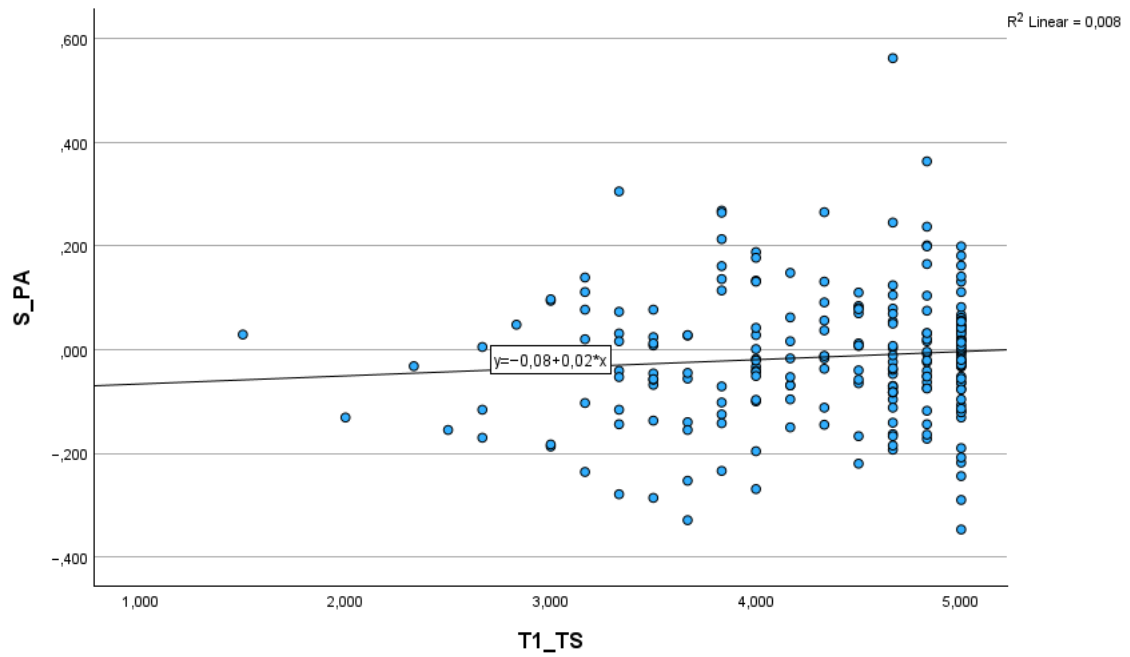

*Note.* S\_PA = Slope PA. T1\_TS = Teacher sensitivity at T1.

**Figure S3**

*Scatterplot illustrating the relationship between Family satisfaction at T1 and positive affect slope over time*

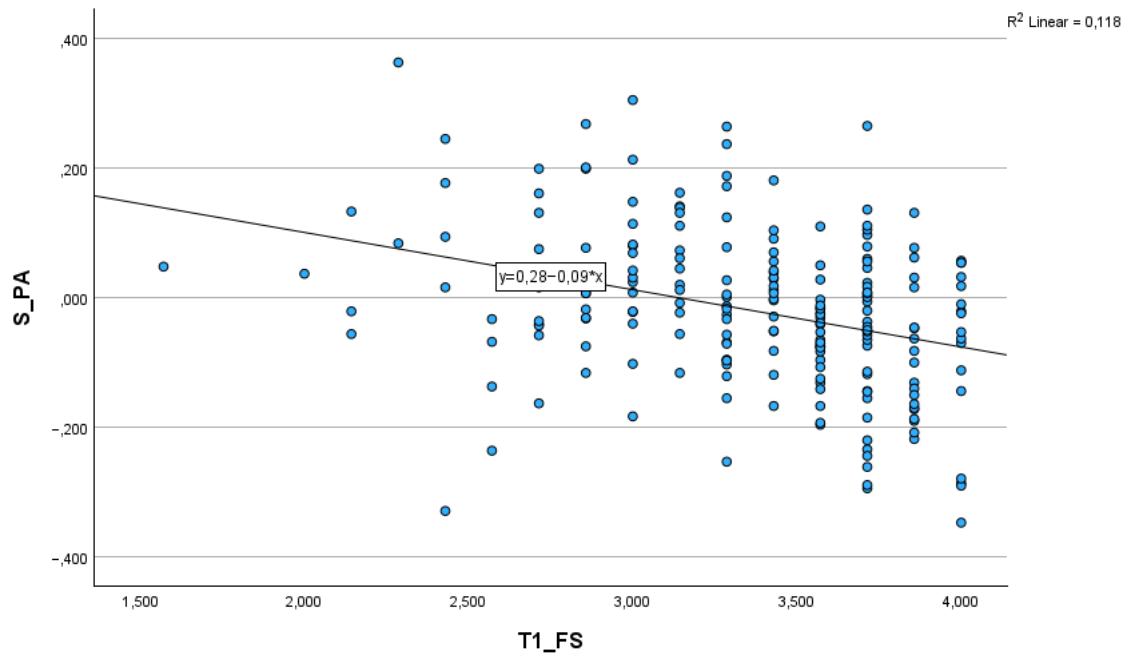

*Note.* S\_PA = Slope PA. T1\_FS = Family satisfaction at T1.
